# Supplementary material
Source: PubMed Central journal article supplement (PMC5577939)
Supplement: NIHMS897328-supplement-supplement_1.pdf [file NIHMS897328-supplement-supplement_1.pdf]

**Supplementary Table I.** *P*-values for comparison of index value distributions among FS patients, endemic controls, and US controls.<sup>1</sup>

|      |       | FS vs EC        | FS vs US  | EC vs US  |
|------|-------|-----------------|-----------|-----------|
| IgG1 | Dsg1  | 2.20E-19*       | 6.30E-32* | 1.20E-24* |
|      | Dsg2  | 2.90E-23*       | 5.10E-25* | 3.20E-03* |
|      | Dsg3  | 2.00E-18*       | 9.90E-26* | 2.30E-06* |
|      | Dsg4  | <b>1.70E+00</b> | 2.70E-25* | 1.30E-30* |
|      | Dsc1  | 9.30E-07*       | 7.40E-25* | 7.60E-13* |
|      | Dsc2  | 4.60E-13*       | 4.80E-24* | 1.90E-04* |
|      | Dsc3  | 3.10E-11*       | 8.50E-27* | 7.10E-20* |
|      | E-cad | <b>2.80E+00</b> | 1.30E-02* | 3.20E-24* |
| IgG4 | Dsg1  | 3.10E-22*       | 5.80E-32* | 1.90E-13* |
|      | Dsg2  | 1.00E-15*       | 3.50E-30* | 1.10E-24* |
|      | Dsg3  | 7.50E-04*       | 2.90E-04* | 4.10E-19* |
|      | Dsg4  | <b>9.80E+00</b> | 6.10E-06* | 4.30E-14* |
|      | Dsc1  | <b>5.80E-01</b> | 1.70E-21* | 7.90E-24* |
|      | Dsc2  | 1.50E-09*       | 6.80E-30* | 9.10E-26* |
|      | Dsc3  | <b>9.20E-01</b> | 1.60E-12* | 5.40E-05* |
|      | E-cad | <b>1.60E-01</b> | 1.90E-21* | 1.50E-27* |

<sup>1</sup>The data from which these *P*-values were derived are depicted in Figure 1. To adjust for multiple comparisons with an overall of 0.05, only *P*-values below 0.05/48=0.001 are considered statistically significant (marked by an asterisk (\*)). The total number of subjects in each group is as follows: FS patients (n=101), endemic controls (n=106), and US controls (n=106). Index value *P*-values for all pairwise comparisons using the Wilcoxon two-sample test are shown.

Abbreviations: Dsg, desmoglein; Dsc, desmocollin; E-cad, E-cadherin; FS, fogo selvagem; EC, endemic controls; US, US controls.

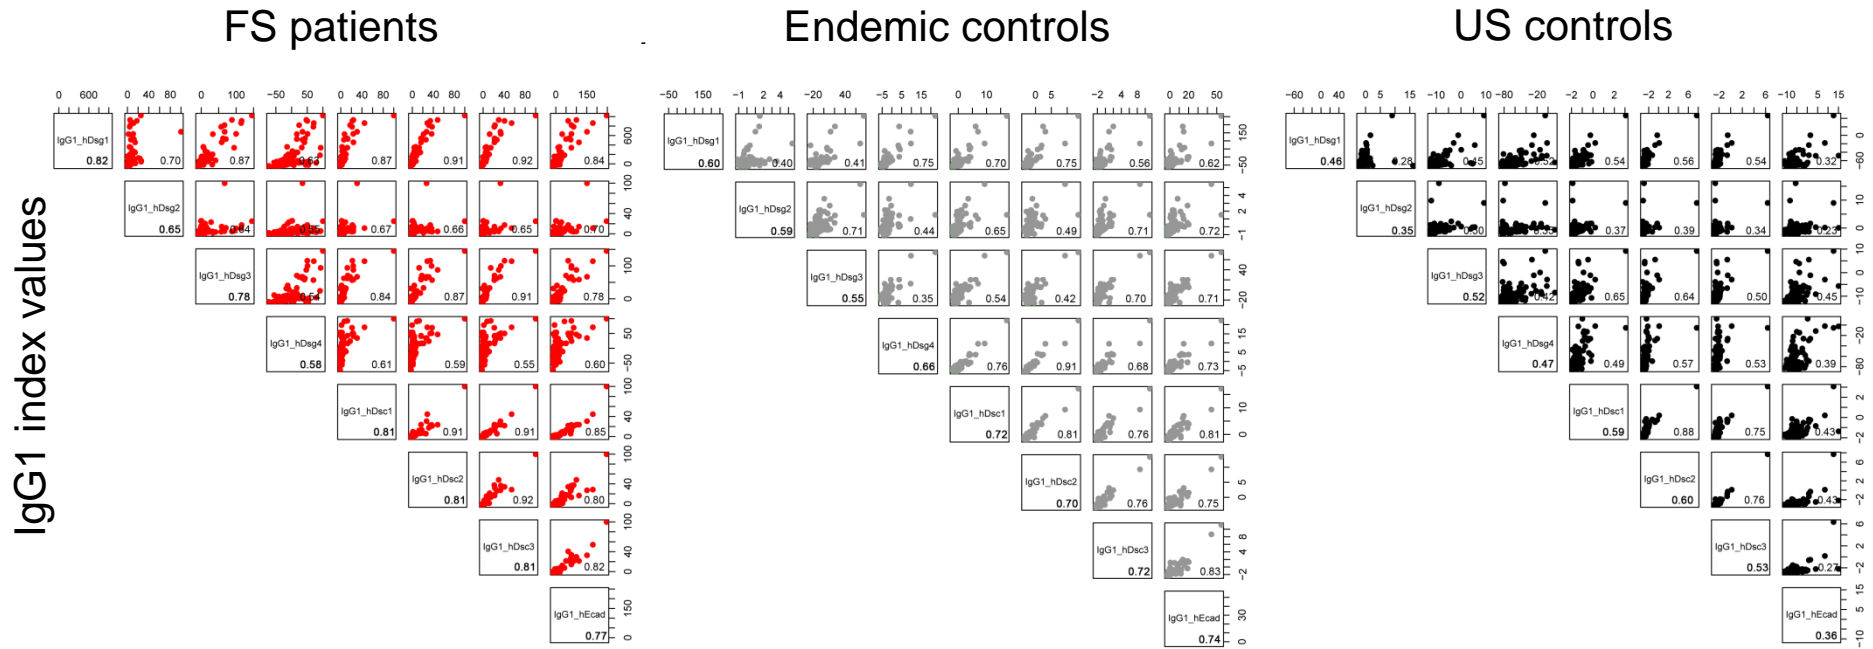

**Supplementary Figure 1.** Correlation among anti-keratinocyte cadherin IgG1 responses. Fogo Selvagem (FS) patient, endemic control, and US control autoantibody response correlations are depicted by index value scatter plots for IgG1 responses. The Spearman correlation coefficient ( $r$  value) for each scatter plot is shown in the bottom right corner of each plot. Average  $r$  values for each antigen response is shown in the bottom for each antigen. Dsg, desmoglein; Dsc, desmocollin; Ecad, E-cadherin.

## FS patients

IgG4 index values

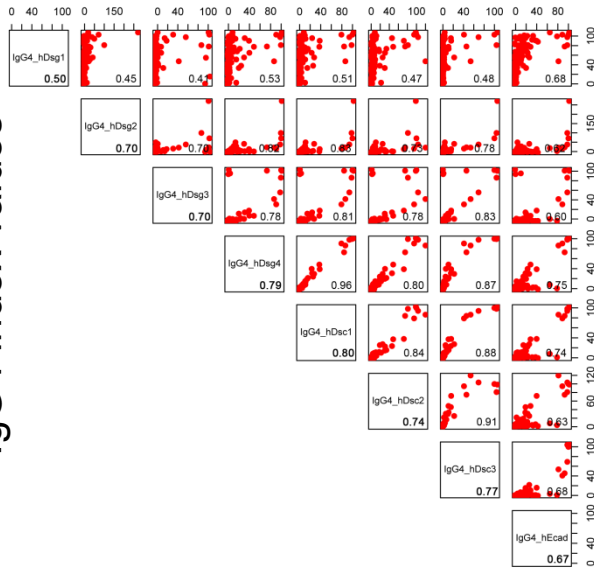

## Endemic controls

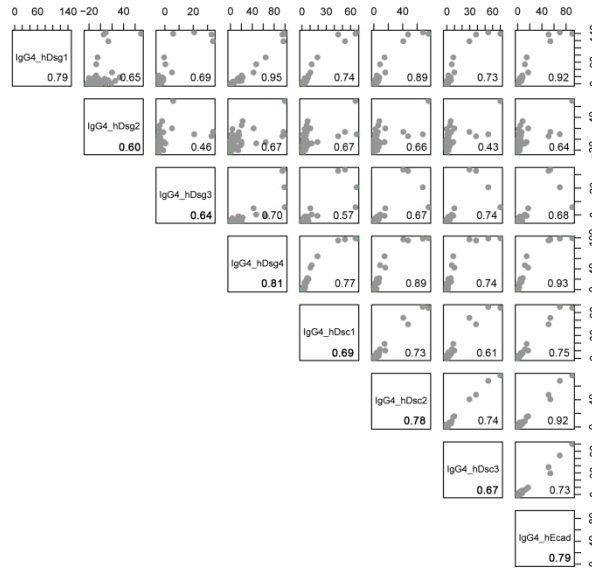

## US controls

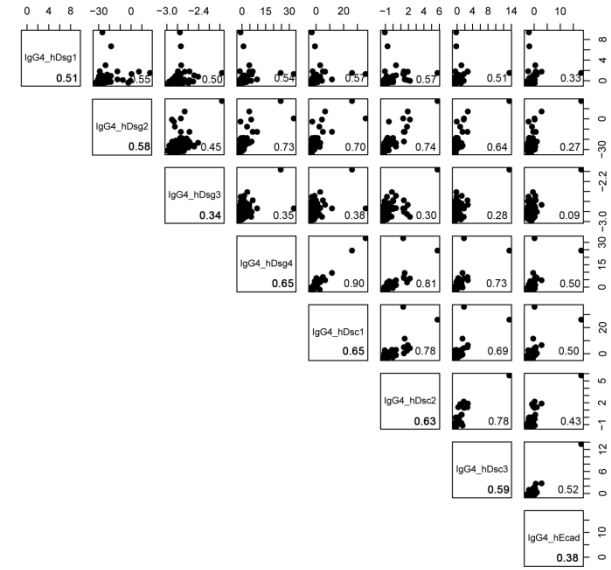

**Supplementary Figure 2.** Correlation among anti-keratinocyte cadherin IgG4 responses. Fogo Selvagem (FS) patient, endemic control, and US control autoantibody response correlations are depicted by index value scatter plots for IgG4 responses. The Spearman correlation coefficient ( $r$  value) for each scatter plot is shown in the bottom right corner of each plot. Average  $r$  values for each antigen response is shown in the bottom for each antigen. Dsg, desmoglein; Dsc, desmocollin; Ecad, E-cadherin.

**Supplementary Table II.** The levels of anti-Dsg1 (native and denatured) autoantibodies of the individuals before (pre-) and after (post-) the onset of FS.<sup>1</sup>

| Patient     | IgG1   |           |        |           | IgG4   |           |        |           |
|-------------|--------|-----------|--------|-----------|--------|-----------|--------|-----------|
|             | Pre-   |           | Post-  |           | Pre-   |           | Post-  |           |
|             | Native | Denatured | Native | Denatured | Native | Denatured | Native | Denatured |
| <b>FS1</b>  | 0.122  | 0.105     | 0.114  | 0.092     | 0.972  | 0.972     | 0.975  | 0.956     |
| <b>FS2</b>  | 0.138  | 0.150     | 0.329  | 0.263     | 0.137  | 0.134     | 0.479  | 0.380     |
| <b>FS3</b>  | 0.081  | 0.075     | 0.086  | 0.075     | 0.131  | 0.128     | 0.179  | 0.072     |
| <b>FS4</b>  | 0.671  | 0.579     | 0.420  | 0.332     | 0.114  | 0.105     | 0.149  | 0.120     |
| <b>FS5</b>  | 0.096  | 0.088     | 0.069  | 0.056     | 0.068  | 0.067     | 0.112  | 0.078     |
| <b>FS6</b>  | 0.513  | 0.556     | 0.521  | 0.541     | 0.249  | 0.233     | 0.355  | 0.180     |
| <b>FS7</b>  | 0.083  | 0.071     | 0.240  | 0.210     | 0.101  | 0.077     | 0.271  | 0.113     |
| <b>FS8</b>  | 0.130  | 0.116     | 0.197  | 0.181     | 0.080  | 0.084     | 0.160  | 0.155     |
| <b>FS9</b>  | 0.395  | 0.339     | 0.355  | 0.311     | 1.510  | 1.481     | 1.857  | 0.880     |
| <b>FS10</b> | 0.077  | 0.074     | 1.030  | 0.978     | 0.261  | 0.253     | 0.733  | 0.696     |
| <b>FS11</b> | 0.075  | 0.068     | 0.101  | 0.081     | 0.082  | 0.080     | 0.112  | 0.107     |

<sup>1</sup>The OD values of the ELISA results are shown in the table.
